# Supplementary material for: Involvement of microRNA-related regulatory pathways in the glucose-mediated control of Arabidopsis early seedling development
Source: PubMed Central journal article supplement (PMC3808316; doi:10.1093/jxb/ert239), 2013-08-30
Supplement: supp_ert239_jexbot096099_file002.pdf [file supp_ert239_jexbot096099_file002.pdf]

***Journal of Experimental Botany, Involvement of microRNA-related regulatory pathways in the glucose-mediated control of Arabidopsis early seedling development.***

Gustavo Turqueto Duarte, Cleverson Carlos Matioli, Bikram Datt Pant, Armin Schlereth, Wolf-Rüdiger Scheible, Mark Stitt, Renato Vicentini, Michel Vincentz

**Supplementary Table S1.**

| Target               | AGI       | Primer Sequences           |                                | Reference                 |
|----------------------|-----------|----------------------------|--------------------------------|---------------------------|
|                      |           | Forward (5' - 3')          | Reverse (5' - 3')              |                           |
| <i>PAP1/AtMYB75*</i> | AT1G56650 | GGTTGAACTATTTGAAGCCA       | GCAATTAAGACCACCTATTC           | Luo <i>et al.</i> , 2011  |
| <i>TAS4</i>          | AT3G25795 | CGACCTCGATCCTTACCT         | ATTTTCTAGACCTGCATTGTTAT        |                           |
| <i>AT2G28390</i>     | AT2G28390 | AACTCTATGCAGCATTGATCCACT   | TGATTGCATATCTTTATCGCCATC       |                           |
| <i>AT5G15710</i>     | AT5G15710 | AAGTTCGCCAGCAAACATGTC      | GCTGACCAGGTCTTCATTAACACTG      |                           |
| <i>PP2A/PDF2</i>     | At1g13320 | TAGATCGCTCGGAACCTTGAAA     | CCTCACAAAACCTCAAATCACTCC       |                           |
| <i>Pri-miR156d</i>   | AT5G10945 | CAGAAGAGAGTGAGCACAAAAGGG   | GTGAGCACGAAAAGCAACCATATAC      |                           |
| <i>Pri-miR156f</i>   | AT5G26147 | TGGTGAGGAATTGATGGTGACA     | CCTTCAAATATGCAAGAAAGCCAC       |                           |
| <i>Pri-miR159b</i>   | AT1G18075 | GGAGGGTTTAGCAGGGTGAAGTAAAG | CCAAAGAAGAGTGAAGCCATTAAGGG     |                           |
| <i>Pri-miR166c</i>   | AT5G08712 | AGTGTGAGAGGATTGTTGTCTGGC   | GAATGAAGCCTGGTCCGAGAATCATC     |                           |
| <i>Pri-miR169a</i>   | AT3G13405 | AAAGTAACATGATCGCAAGTTGTCC  | GCGACACAAAGTAACGTGTAGCC        | Pant <i>et al.</i> , 2009 |
| <i>Pri-miR390a</i>   | AT2G38325 | TAGCGCATGATGATCACATTC      | AATGAAACTCAGGATGGATAGCG        |                           |
| <i>Pri-miR399c</i>   | AT5G62162 | CATCTTTCTATTGGCAGGCGACTTGG | AAGCAGTGACAGGGCAACTCTCC        |                           |
| <i>Pri-miR773</i>    | AT1G35501 | AGGAGGCAATAGCTTGAGCAAA     | AGGTGACAGCTTTAGTCGATGGA        |                           |
| <i>Pri-miR775</i>    | AT1G78206 | CATTGAAACTGTCTTTCAACATCCCA | TGGCACTGCTAGACATCGAAAAT        |                           |
| <i>Pri-miR823</i>    | AT3G13724 | CCATTTAGTTCTAGTGGTGGTGAT   | GATATGTTTCACTGTTACCATTACCAATCT |                           |
| <i>Pri-miR827</i>    | AT3G59884 | TCCTTGTGTTGATCGATTGGTTTA   | CGATGCAAAACCACGAAAGAG          |                           |
| <i>Pri-miR828</i>    | AT4G27765 | AAATGATTCACTCACTCGTAT      | GATATTAATAGTCCCACTTCC          |                           |
| <i>UBQ10</i>         | AT4G05320 | GGCCTTGATAATCCCTGATGAATAAG | AAAGAGATAACAGGAACGAAACATAGT    |                           |
| <i>ABI3*</i>         | AT3G24650 | GCAGTGCCGCCCTCAATTAC       | TTCTGGTTTCCATCCCTGCC           |                           |
| <i>ABI4</i>          | AT2G40220 | GAGGTGGCGTTAGGGCAGG        | GGTGGATGAGTTATTGATAGAC         |                           |
| <i>ABI5*</i>         | AT2G36270 | GCAAGAAAACAAGCATATACAG     | TTCTCTTCTCTCCAACCTC            |                           |
| <i>ARF3*</i>         | AT2G33860 | CTGTCTCTGAGGGGATTCTG       | GGCTCCACCATCCGAACAAG           |                           |
| <i>AT1G53290*</i>    | AT1G53290 | TATCGAAGAGGAGTACAGTAAG     | TAGCAGAGAGAGTCGATCTG           |                           |
| <i>CMT3*</i>         | AT1G69770 | TCAGTTTCAATCAAAGTCC        | AATTCGCTCCCTTTCTCTTGG          | This Work                 |
| <i>MET2/DMT2*</i>    | AT4G14140 | AGGTTTACGCTATGATGCTGG      | GTAGTCCATACTCTTTGTTTAT         |                           |
| <i>MYB33*</i>        | AT5G06100 | GCACGTATGGCTGCACATTTG      | CACTCAAGTGCCTCAACATGC          |                           |
| <i>NF-YA5*</i>       | AT1G54160 | AATGCCGTAACCGTACCTTC       | GCTTCTTTGTATTGAGGAAACG         |                           |
| <i>PHV/ATHB9*</i>    | AT1G30490 | AACATGAAGAGTTTCTCGAAG      | AGCACAACTCCAACCACATT           |                           |
| <i>SPL13A*</i>       | AT5G50570 | ACAATGCAGCAGTTTCATG        | GACGACCGATATGTTACAGGC          |                           |
| <i>TAS3</i>          | AT3G17185 | AAACATAACCTCCGTGATGC       | GCTCAGATAGGATAACACCG           |                           |

**Note.** Primer pairs spanning exon-exon junctions are marked with an asterisk.

## Supplementary Table S1. Continued.

| miRNA Primer Sequences |                                 |                                                    |           |
|------------------------|---------------------------------|----------------------------------------------------|-----------|
| miRNA                  | Amplification Forward (5' - 3') | Reverse Transcription Primer (5' - 3')             | Reference |
| miR159                 | CGGCGGTTTGGATTGAAGGGA           | GTCGTATCCAGTGCAGGGTCCGAGGTATTCGCACTGGATACGACAAGAGC | This Work |
| miR166                 | CTCGCTTCGACCAGGCTTCA            | GTCGTATCCAGTGCAGGGTCCGAGGTATTCGCACTGGATACGACGGGGAA |           |
| miR169                 | CGTGAGCAGCCAAGGATGACT           | GTCGTATCCAGTGCAGGGTCCGAGGTATTCGCACTGGATACGACTCGGCA |           |
| miR390                 | GGACGGAAGCTCAGGAGGGAT           | GTCGTATCCAGTGCAGGGTCCGAGGTATTCGCACTGGATACGACGGCGCT |           |
| miR773                 | CGATGCGTTTGCTTCCAGCTTT          | GTCGTATCCAGTGCAGGGTCCGAGGTATTCGCACTGGATACGACGAGACA |           |
| miR775                 | GCGGCGGTTTCGATGTCTAGCA          | GTCGTATCCAGTGCAGGGTCCGAGGTATTCGCACTGGATACGACTGGCAC |           |
| miR823                 | GGACGGTGGGTGGTGATCATA           | GTCGTATCCAGTGCAGGGTCCGAGGTATTCGCACTGGATACGACATCTTA |           |
| miR828                 | CGGCGGTCTTGCTTAAATGAGT          | GTCGTATCCAGTGCAGGGTCCGAGGTATTCGCACTGGATACGACTGGAAT |           |
| miR156                 | GCGGCGGTGACAGAAGAGAGT           | GTCGTATCCAGTGCAGGGTCCGAGGTATTCGCACTGGATACGACGTGCTC |           |
| miRuniversal-R*        | -                               | GTGCAGGGTCCGAGGT                                   |           |

**Note.** The miRuniversal is the amplification reverse primer for all miRNAs.

**Supplementary Table S2.** Glucose-regulated pri-miRs and corresponding miRNAs targets.

| miRNA Family | 4% Glucose-responsive pri-miRNAs           | 4% Mannitol fold   4% Glucose fold                            | Target Family | Target Genes                                                                                                                                                                                                               |
|--------------|--------------------------------------------|---------------------------------------------------------------|---------------|----------------------------------------------------------------------------------------------------------------------------------------------------------------------------------------------------------------------------|
| 156/157      | <u>156d</u><br><u>156f</u><br>157a<br>157c | 1.24   -1.67<br>-1.02   -7.62<br>1.24   -2.83<br>1.95   -2.50 | SPL           | AT1G27360, AT1G27370, AT1G53160, AT1G69170, AT2G33810*, AT2G42200, AT3G15270*, AT3G57920, AT5G43270, AT5G50570, AT5G50670                                                                                                  |
| 158          | 158b                                       | 1.34   3.42                                                   | PPR           | -                                                                                                                                                                                                                          |
| 159          | 159b                                       | 3.24   6.70                                                   | MYB           | AT2G26950, AT2G32460, AT4G26930, AT5G55020                                                                                                                                                                                 |
| 161          | 161a                                       | 1.89   4.90                                                   | PPR           | AT1G06580, AT1G62590, AT1G62670, AT1G62860, AT1G62910, AT1G62930, AT1G63070, AT1G63080, AT1G63130, AT1G63150, AT1G63230, AT1G63330, AT1G63400, AT1G64580, AT2G41720, AT3G16710, AT4G26800, AT5G16640, AT5G41170, AT5G65560 |
| 163          | 163a                                       | 1.86   -1.87                                                  | SAMT          | AT1G66690, AT1G66700, AT1G66720, AT3G44860, AT3G44870                                                                                                                                                                      |
| 164          | 164a                                       | 1.15   -2.59                                                  | NAC           | AT1G56010, AT3G12977, AT3G15170, AT5G07680, AT5G53950, AT5G61430                                                                                                                                                           |
| 165/166      | 165a<br>165b<br>166c                       | 1.17   3.68<br>1.63   3.36<br>3.55   -1.61                    | HD-ZIP III    | AT1G30490, AT1G52150, AT2G34710, AT4G32880, AT5G60690                                                                                                                                                                      |
| 167          | <u>167d</u>                                | 2.72   -3.38                                                  | ARF           | -                                                                                                                                                                                                                          |
| 169          | 169a                                       | 1.90   4.37                                                   | HAP2          | AT1G17590, AT1G54160, AT1G72830, AT3G20910, AT5G12840                                                                                                                                                                      |
| 173          | 173a                                       | 1.64   5.61                                                   | TAS1,TAS2     | AT1G50055, AT2G27400, AT2G39675, AT2G39681                                                                                                                                                                                 |
| 390          | 390a                                       | 1.29   9.88                                                   | TAS3          | AT3G17185                                                                                                                                                                                                                  |
| 394          | 394a                                       | -1.06   5.51                                                  | F-Box         | AT1G27340                                                                                                                                                                                                                  |
| 395          | 395a                                       | -1.21   4.67                                                  | APS,AST       | AT3G22890, AT4G14680, AT5G10180, AT5G43780                                                                                                                                                                                 |
| 399          | 399a<br>399c                               | 2.45   5.03<br>-17.71   8.00                                  | E2-UBC        | AT2G33770                                                                                                                                                                                                                  |
| 402          | 402                                        | 1.10   2.52                                                   | ROS1-Like     | AT4G34060                                                                                                                                                                                                                  |
| 413          | 413                                        | 1.55   4.96                                                   | -             | -                                                                                                                                                                                                                          |
| 773          | 773                                        | 4.72   17.45                                                  | MET2          | AT4G14140                                                                                                                                                                                                                  |
| 775          | 775                                        | 4.00   22.28                                                  | GT            | AT1G53290                                                                                                                                                                                                                  |
| 777          | 777                                        | 1.23   3.25                                                   | CIP4.1-like   | AT1G30060                                                                                                                                                                                                                  |
| 779          | 779                                        | 2.84   7.39                                                   | -             | AT5G53890                                                                                                                                                                                                                  |
| 823          | 823                                        | 4.40   17.06                                                  | CMT3          | AT1G69770                                                                                                                                                                                                                  |
| 825          | <u>825</u>                                 | 1.22   -3.61                                                  | -             | -                                                                                                                                                                                                                          |
| 827          | 827                                        | -1.53   3.39                                                  | SPX           | AT1G02860                                                                                                                                                                                                                  |
| 828          | 828                                        | 1.41   3.93                                                   | MYB           | AT1G66370                                                                                                                                                                                                                  |
| 829          | 829                                        | 2.85   10.91                                                  | -             | -                                                                                                                                                                                                                          |
| 850          | 850                                        | -1.31   -3.90                                                 | -             | -                                                                                                                                                                                                                          |
| 856          | 856                                        | 6.67   13.39                                                  | CHX           | AT5G41610                                                                                                                                                                                                                  |
| 861          | 861                                        | 1.43   -2.31                                                  | -             | -                                                                                                                                                                                                                          |
| 863          | 863                                        | -1.12   -3.39                                                 | -             | -                                                                                                                                                                                                                          |
| 865          | 865                                        | -1.08   2.03                                                  | -             | -                                                                                                                                                                                                                          |
| 3932         | <u>3932b</u>                               | -1.09   -9.87                                                 | -             | -                                                                                                                                                                                                                          |
| 4221         | 4221                                       | 2.35   7.06                                                   | -             | -                                                                                                                                                                                                                          |

**Note.** Red denotes induction by glucose after three days of light exposure; green represents repression. Mannitol and glucose fold values are in comparison to the pri-miR expression in non-treated Col-0 seedlings. Potential HXK1-dependent pri-miRs (Figure 2) are underlined. SPL genes marked with an asterisk are exclusive targets of miR156. Target gene families are based on miRBase (Kozomara and Griffiths-Jones, 2011) and TarBase (Vergoulis *et al.*, 2011) databases.

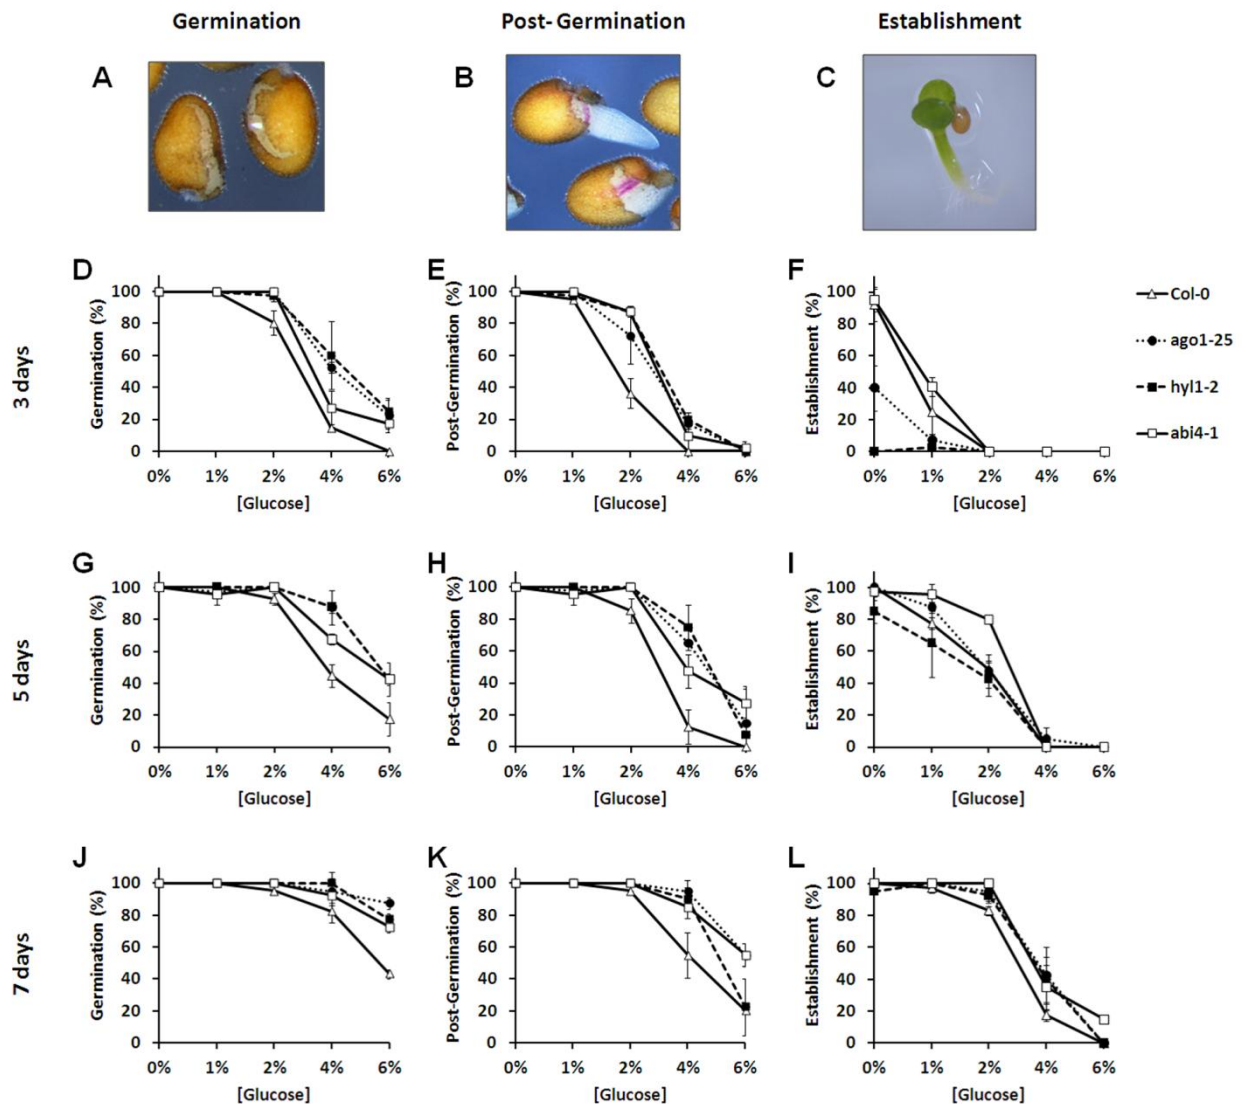

**Supplementary Fig. S1.** Effects of different concentrations of glucose on early seedling development of wild-type Col-0, miRNA-deficient mutants *ago1-25* and *hyl1-2*, and glucose-insensitive mutant *abi4-1/gin6*. (A) Germination (*testa* rupture), (B) post-germination (radicle emergence and elongation), and (C) establishment (cotyledons expansion and greening) were scored three days (D-F), five days (G-I) and seven days (J-L) after light exposure. Seeds of each genotype were sown in MS/2 plates supplied with the indicated sugar concentration, kept for two days at 4°C in the dark for stratification and transferred to continuous light ( $50 \mu\text{mol m}^{-2} \text{s}^{-1}$ ) at 24°C. Results presented are the means  $\pm$  SD of two independent experiments each of which including 20 seeds.

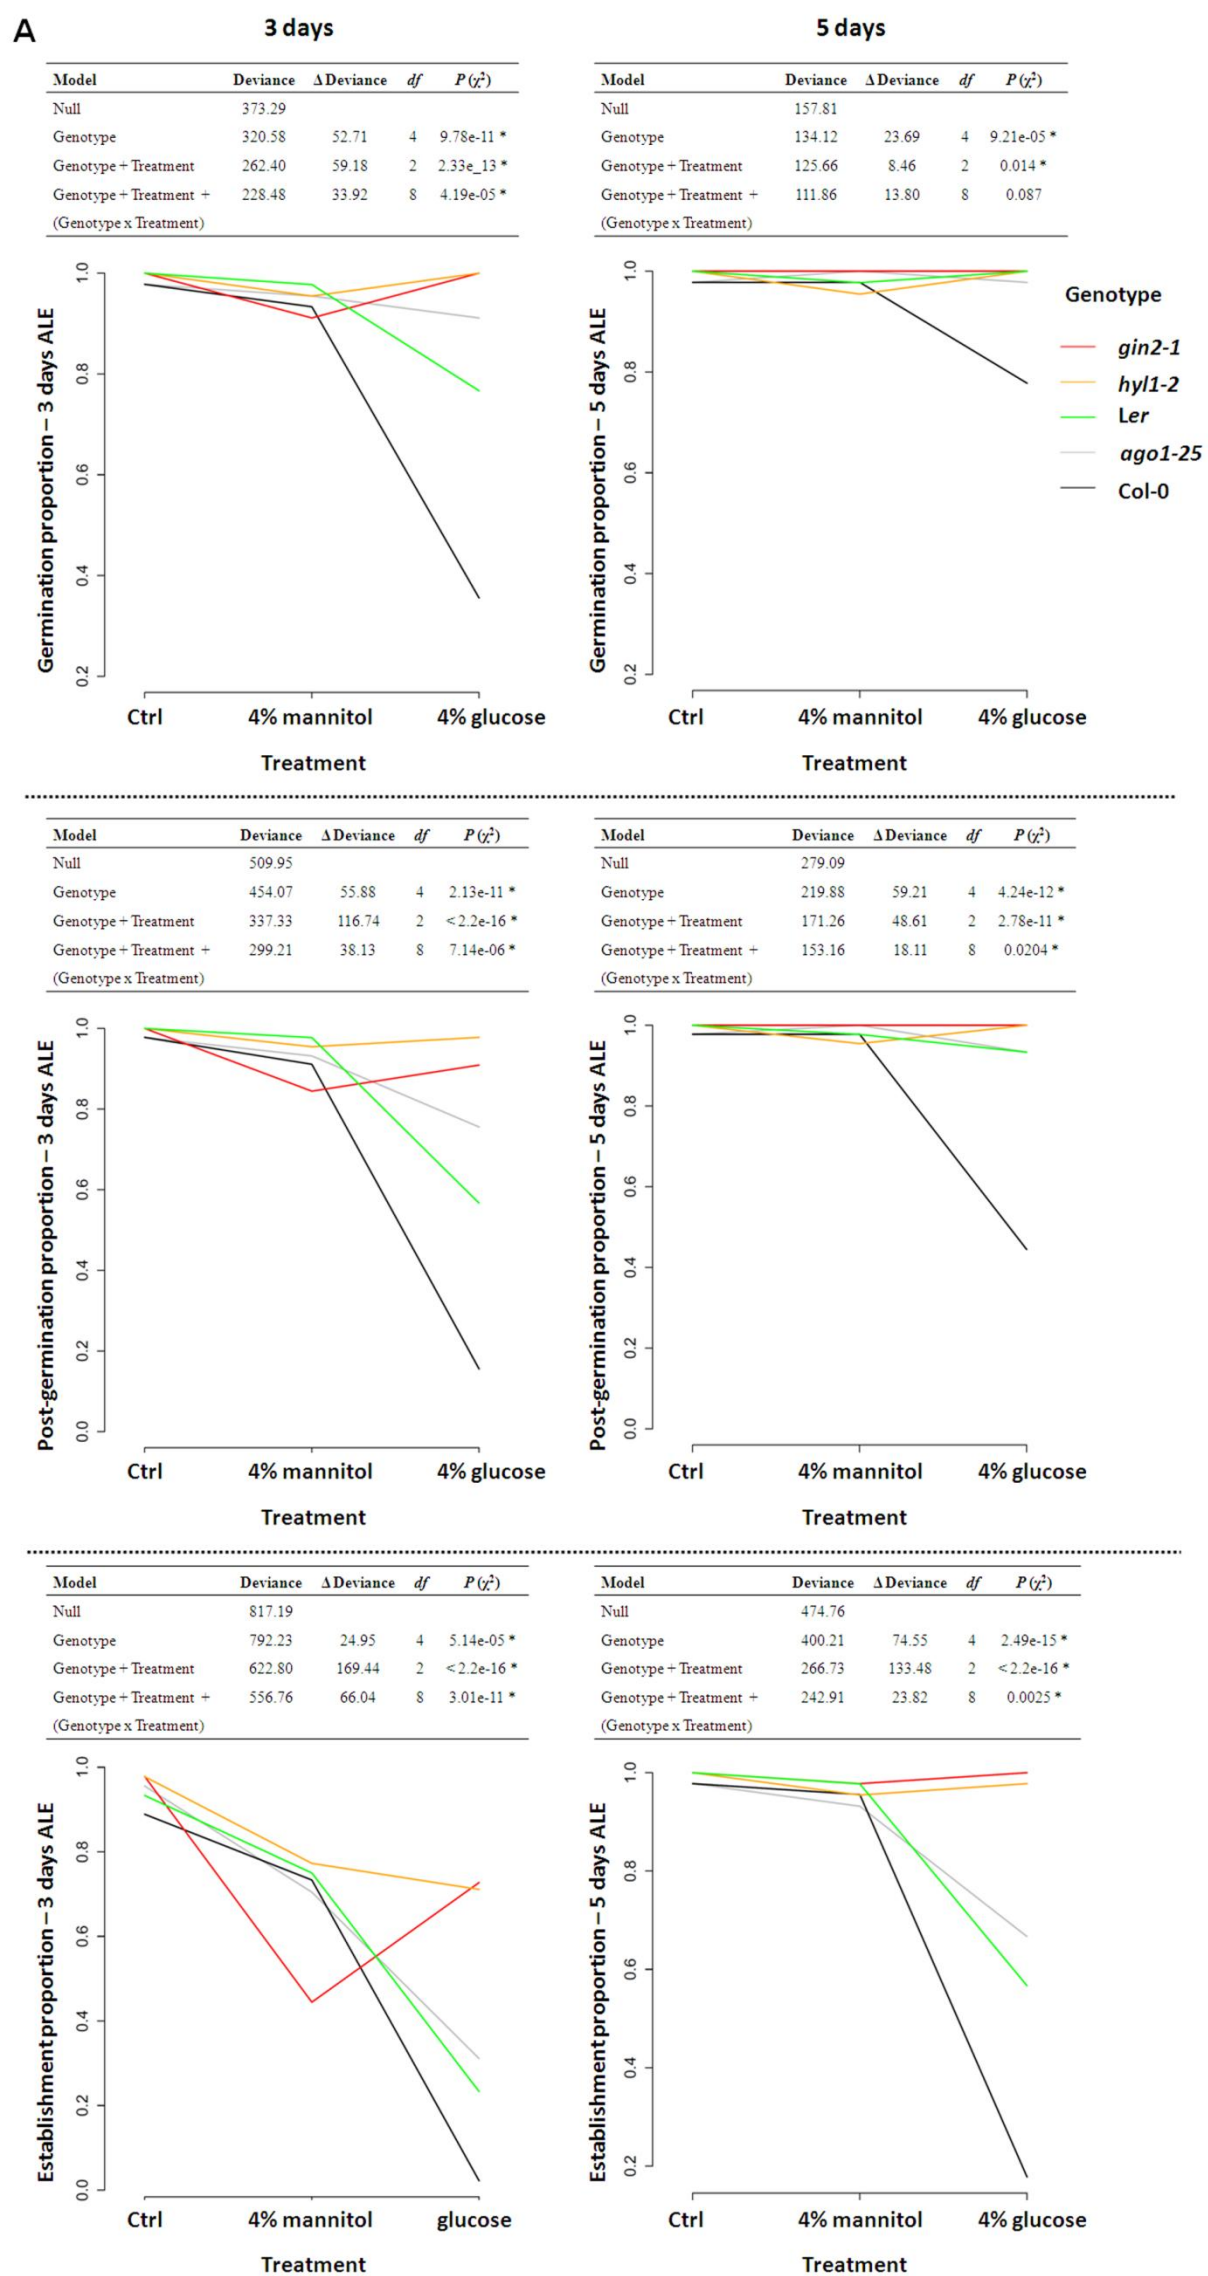

**Supplementary Fig. S2.** Analyses of deviance and interaction plots used to compare the germination and development efficiencies of each genotype grown in the following conditions: **(A)** Three or five days after light exposure in control media or media supplied with 4% glucose or 4% mannitol (Fig. 1 samples); **(B)** Three or five days after light exposure in control media or media supplied with 4% glucose or 4% mannitol (Supplementary Fig. S3 samples); **(C)** Five days after light exposure in control media or media supplied with 0.5-5  $\mu$ M of ABA (Supplementary Fig. S4 samples). The null model considered no effect of treatment or genotype in germination or development efficiencies, nor interaction between these variables. Significant  $p$  values ( $P < 0.05$ ) are marked with an asterisk.

**B**

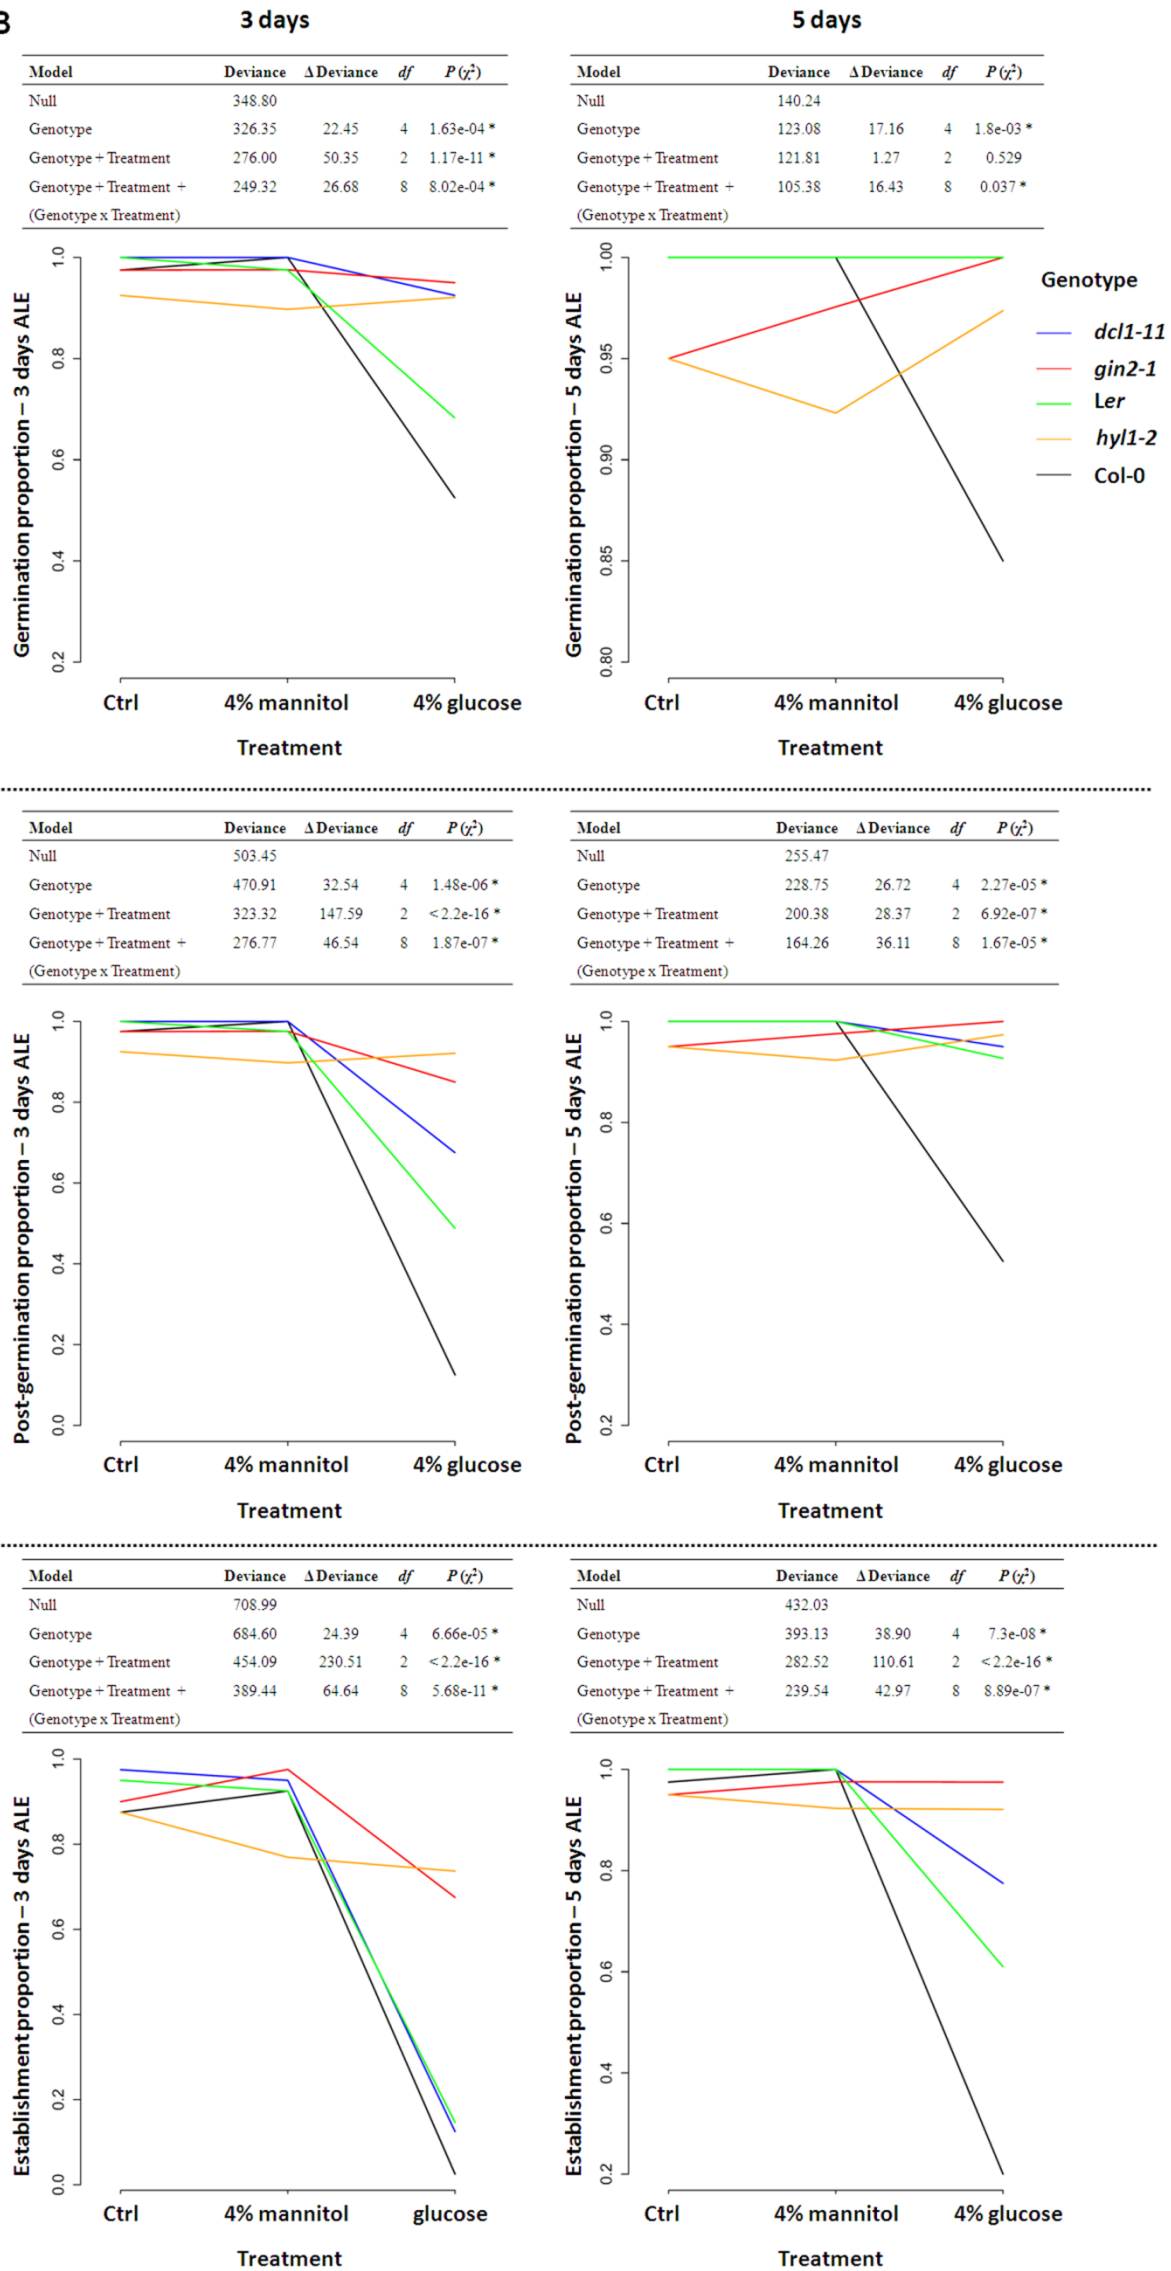

Supplementary Fig. S2. Continued.

**C**

**5 days**

| Model                                            | Deviance | $\Delta$ Deviance | df | $P(\chi^2)$ |
|--------------------------------------------------|----------|-------------------|----|-------------|
| Null                                             | 348.80   |                   |    |             |
| Genotype                                         | 326.35   | 22.45             | 4  | 1.63e-04 *  |
| Genotype + Treatment                             | 276.00   | 50.35             | 2  | 1.17e-11 *  |
| Genotype + Treatment +<br>(Genotype x Treatment) | 249.32   | 26.68             | 8  | 8.02e-04 *  |

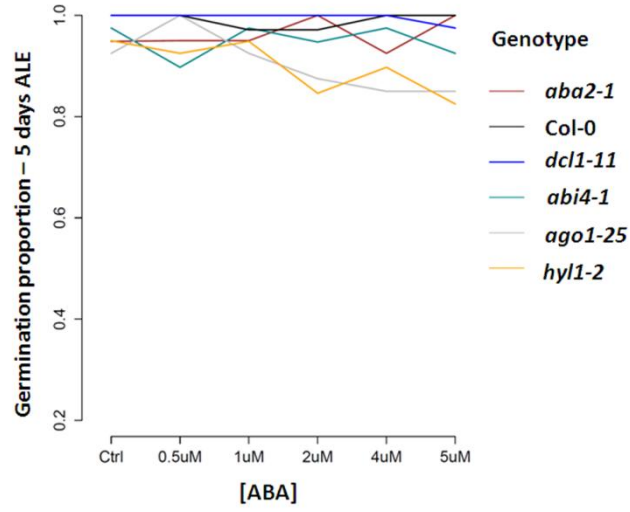

| Model                                            | Deviance | $\Delta$ Deviance | df | $P(\chi^2)$ |
|--------------------------------------------------|----------|-------------------|----|-------------|
| Null                                             | 503.45   |                   |    |             |
| Genotype                                         | 470.91   | 32.54             | 4  | 1.48e-06 *  |
| Genotype + Treatment                             | 323.32   | 147.59            | 2  | <2.2e-16 *  |
| Genotype + Treatment +<br>(Genotype x Treatment) | 276.77   | 46.54             | 8  | 1.87e-07 *  |

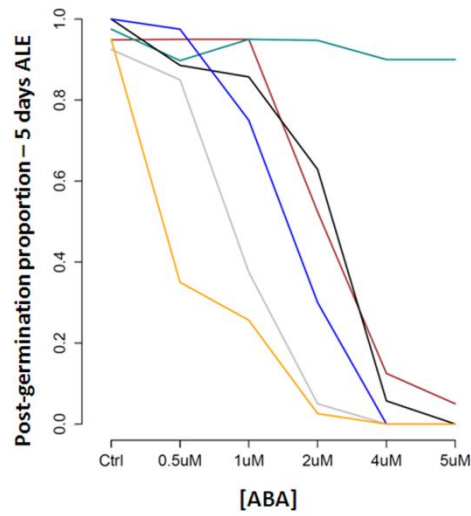

| Model                                            | Deviance | $\Delta$ Deviance | df | $P(\chi^2)$ |
|--------------------------------------------------|----------|-------------------|----|-------------|
| Null                                             | 708.99   |                   |    |             |
| Genotype                                         | 684.60   | 24.39             | 4  | 6.66e-05 *  |
| Genotype + Treatment                             | 454.09   | 230.51            | 2  | <2.2e-16 *  |
| Genotype + Treatment +<br>(Genotype x Treatment) | 389.44   | 64.64             | 8  | 5.68e-11 *  |

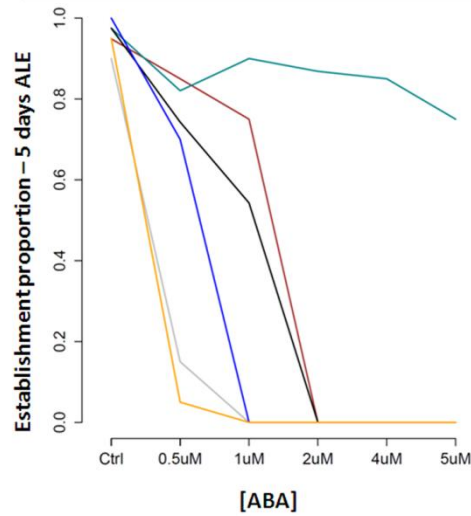



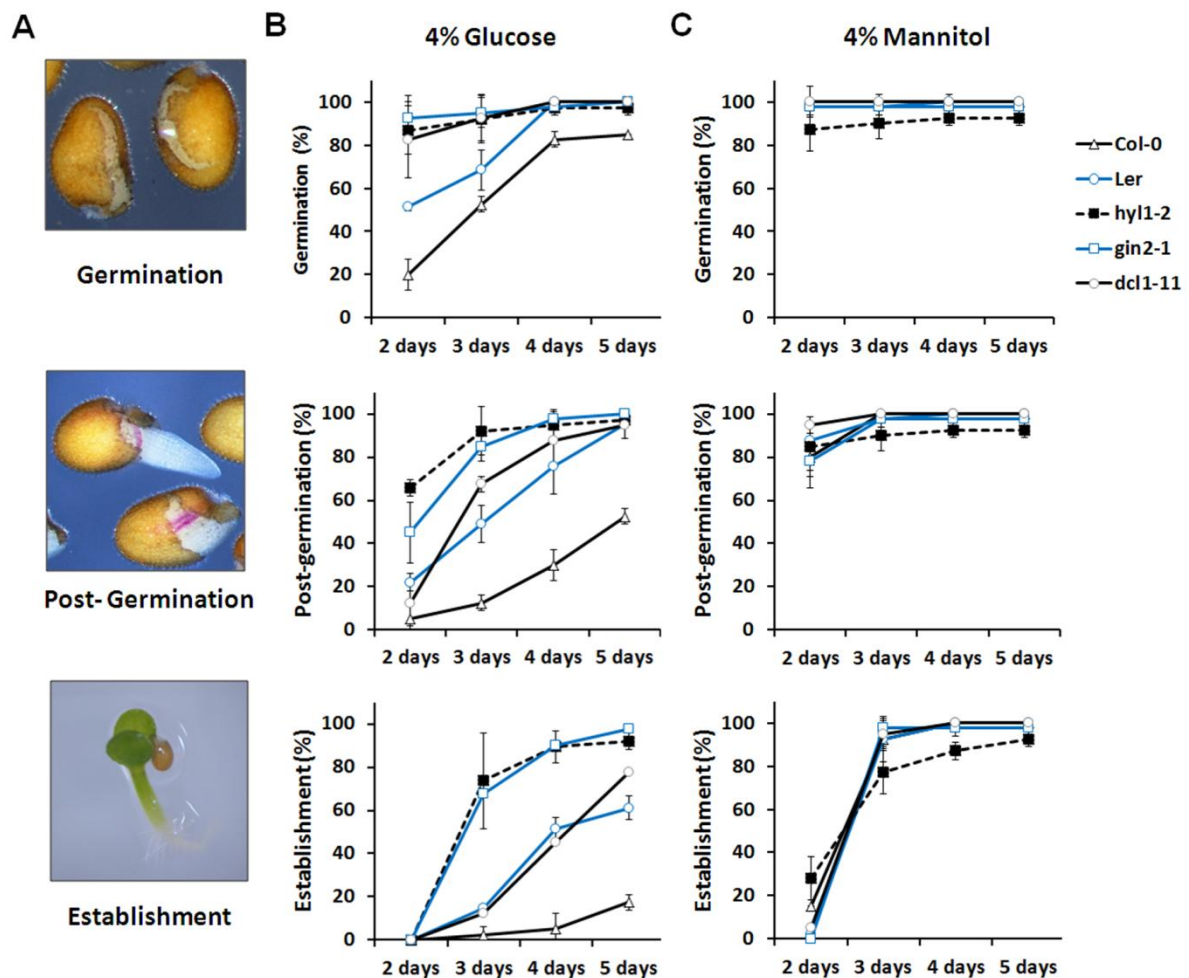

**Supplementary Fig. S3.** Glucose-induced delay of early seedling development is dependent upon miRNA machinery activity (A) Developmental phases that were monitored; Germination (*testa* rupture), post-germination (radicle emergence and elongation) and establishment (cotyledons expansion and greening); (B) Effects of 4% glucose on germination and development of miRNA-deficient mutants *dcl1-11* and *hyl1-2* was less severe than for wild-type Col-0 and *Ler*, and was similar to the glucose insensitive *gin2-1*. (C) Osmotic control 4% mannitol could not reproduce the delay observed for glucose. In media not supplied with sugar, all seeds reached post-germination stage after two days, and establishment within three days after light exposure (Supplementary Fig. S2B). In glucose-supplied media, growth arrest was not observed before seedling establishment stage was reached. Seeds of each genotype were sown in MS/2 plates supplied or not with the indicated sugar, kept for two days at 4°C in the dark for stratification and transferred to continuous light ( $50 \mu\text{mol m}^{-2} \text{s}^{-1}$ ) at 24°C. Germination, post-germination, and establishment were scored from two to five days after light exposure. Results presented are the means  $\pm$  SD of three independent experiments each of which including 20 seeds.



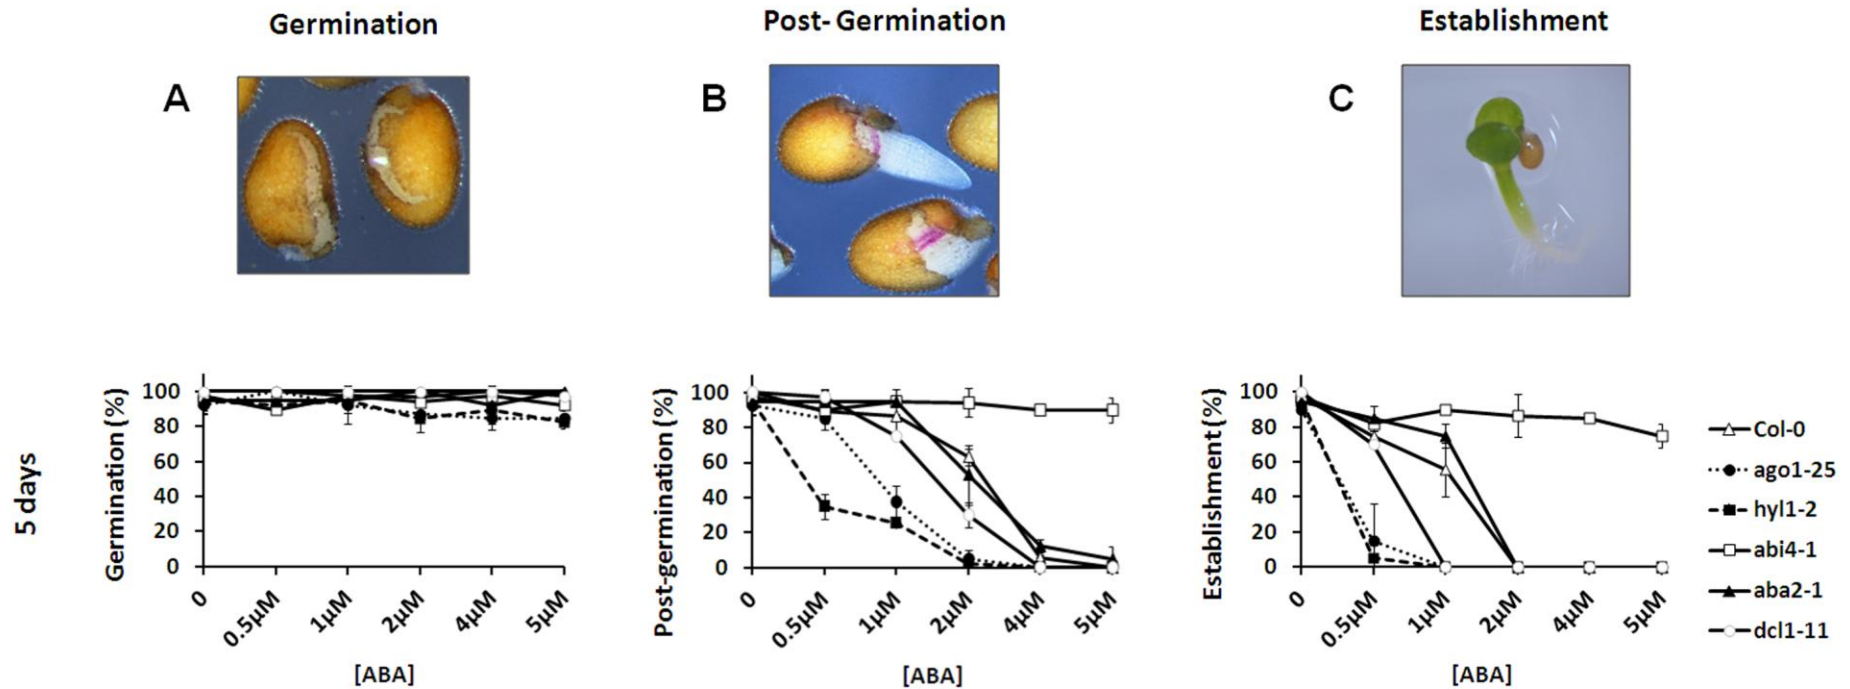

**Supplementary Fig. S4.** Effects of different ABA concentrations on early seedling development of wild-type Col-0, miRNA-deficient mutants *ago1-25*, *dcl1-11* and *hyl1-2*, ABA-insensitive mutant *abi4-1*, and ABA-biosynthesis mutant *aba2-1*. (A) Germination (*testa* rupture), (B) post-germination (radicle emergence and elongation) and (C) establishment (cotyledons expansion and greening) were scored five days after light exposure. Except for the ABA-insensitive mutant *abi4-1*, all genotypes had the development arrested before establishment within five days (Supplementary Fig. S2C). Seeds of each genotype were sown in MS/2 plates supplied with the indicated ABA concentration, kept for two days at 4°C in the dark for stratification and transferred to continuous light ( $50 \mu\text{mol m}^{-2} \text{s}^{-1}$ ) at 24°C. Results presented are the means  $\pm$  SD of two independent experiments each of which including 20 seeds.

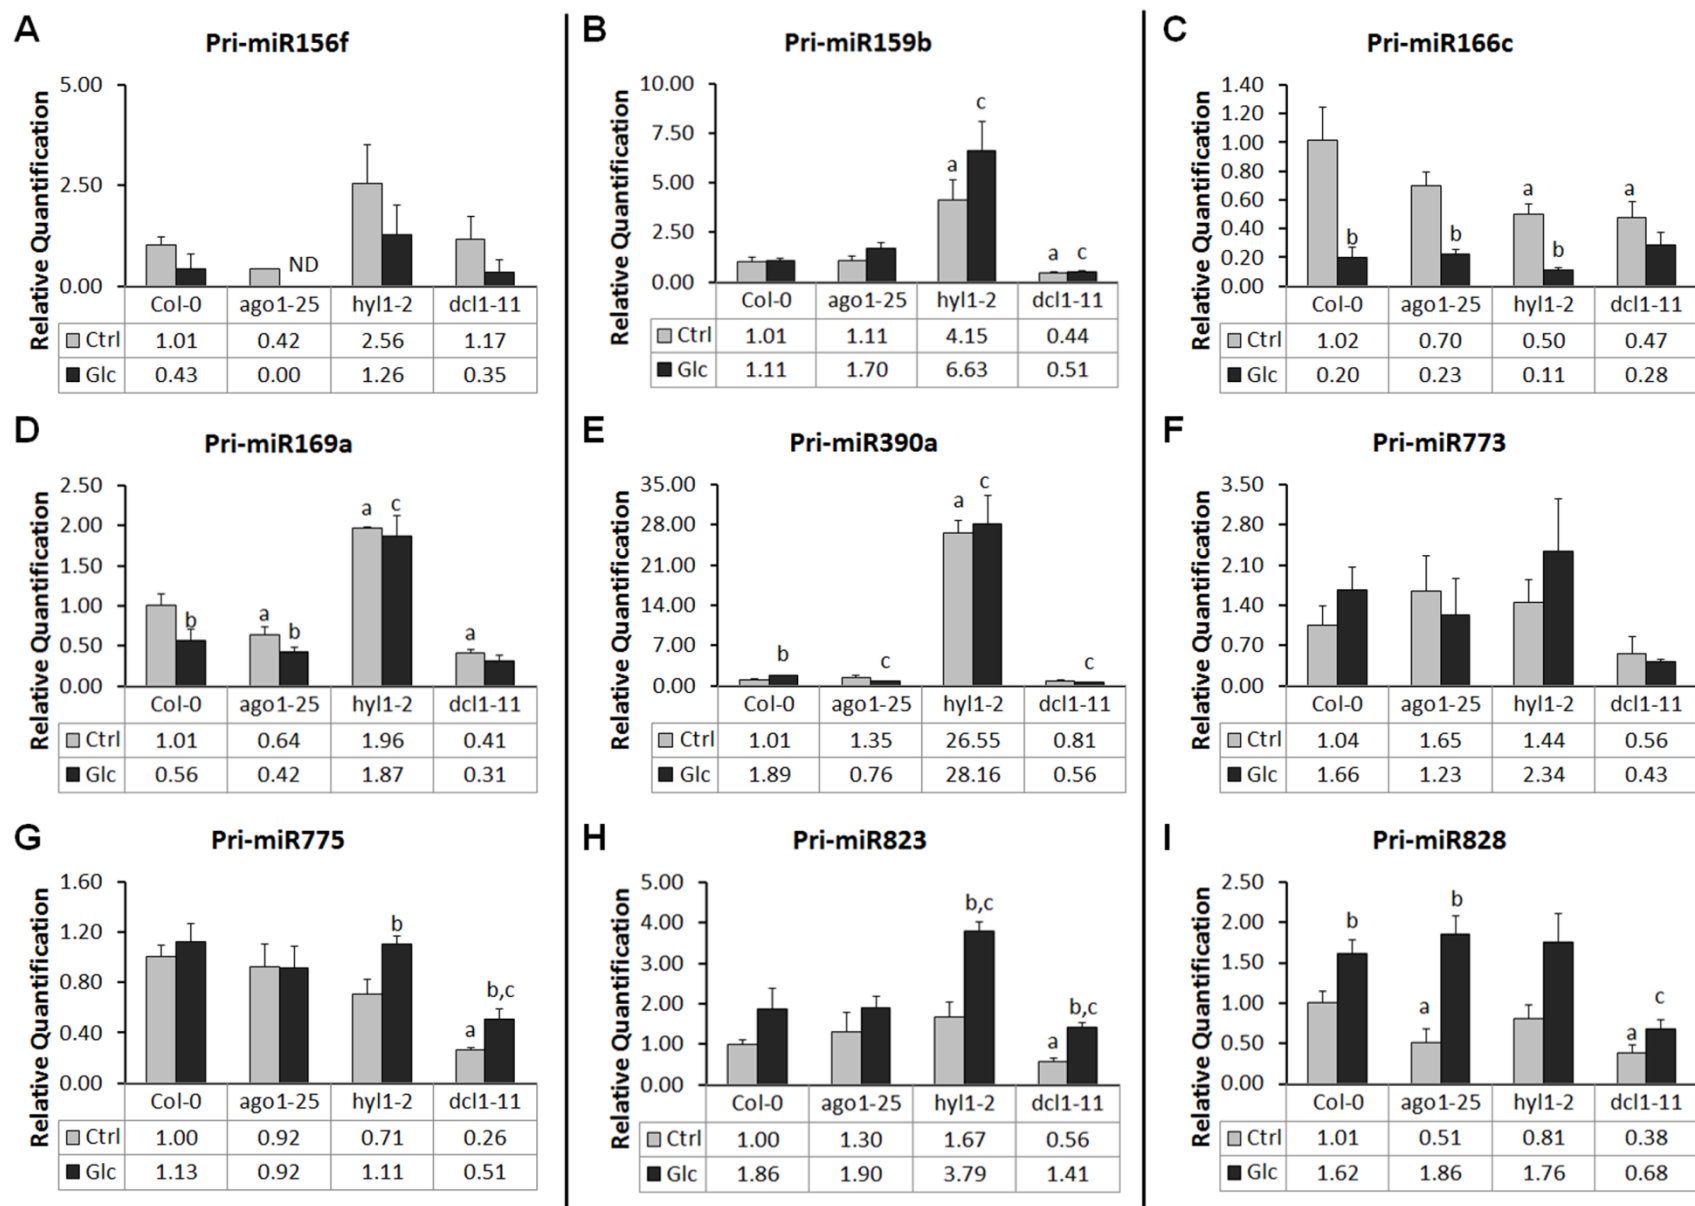

**Supplementary Fig. S5.** Accumulation of (A) pri-miR156f, (B) pri-miR159b, (C) pri-miR166c, (D) pri-miR169a, (E) pri-miR390a, (F) pri-miR773, (G) pri-miR775, (H) pri-miR823, and (I) pri-miR828 in Col-0, *ago1-25*, *dcl1-11* and *hyl1-2* seedlings grown in control media for three days of light exposure and treated for 4h with 4% glucose. All expression values are in comparison to untreated Col-0. The values are means of three biological replicates  $\pm$  SD. Below each graph is given the relative transcript abundance. Changes in transcript accumulation were considered significant for differences with fold change  $\geq$  |1.5| and according to Student's *t* test ( $p < 0.05$ ) for the following comparisons: **a.** untreated *ago1-25*, *dcl1-11* or *hyl1-2* vs untreated Col-0; **b.** glucose vs untreated samples (same genotype); **c.** glucose-treated mutant vs glucose-treated.

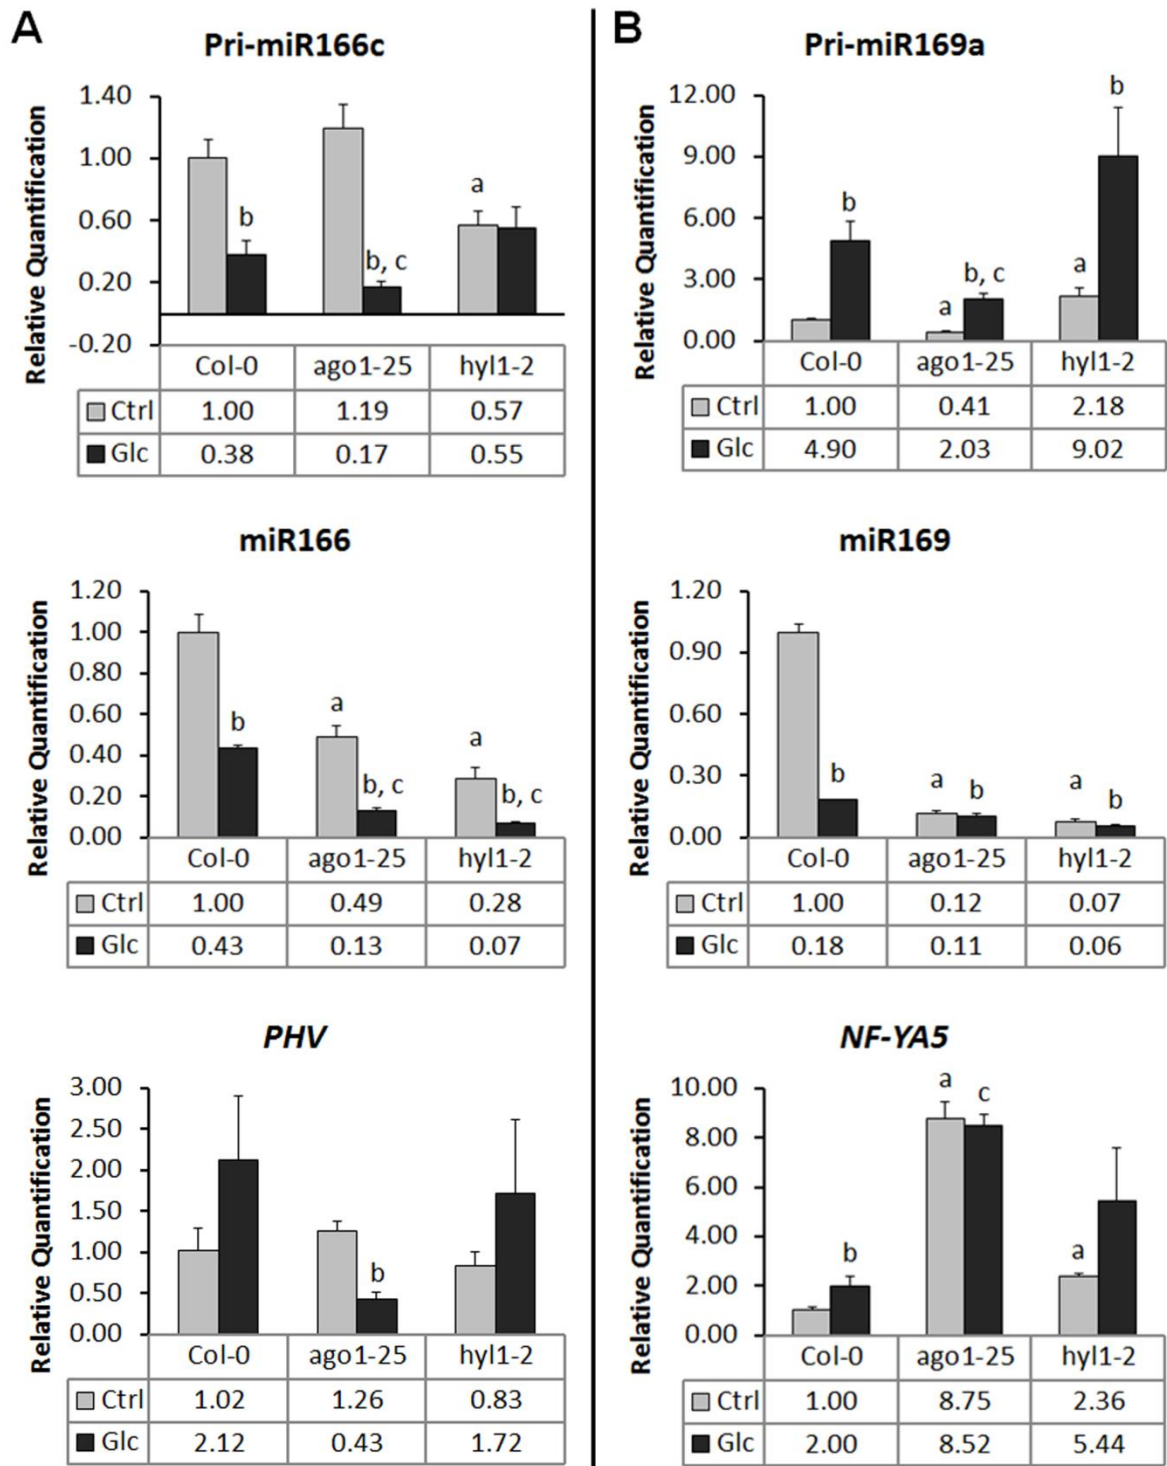

**Supplementary Fig. S6.** Accumulation of (A) pri-miR166c, (B) pri-miR169a, (C) pri-miR390a, (D) pri-miR773, (E) pri-miR775, (F) pri-miR823, (G) pri-miR828 and their corresponding mature miRNA family and respective targets in Col-0, *ago1-25* and *hyl1-2* seedlings grown in 4% glucose or control media after three days of light exposure. All expression values are in comparison to untreated Col-0. The values are means of three biological replicates  $\pm$  SD. Below each graph is given the relative transcript abundance. Changes in transcript accumulation were considered significant for differences with fold change  $\geq |1.5|$  and according to Student's *t* test ( $p < 0.05$ ) for the following comparisons: **a.** untreated *ago1-25* or *hyl1-2* vs untreated Col-0; **b.** glucose vs untreated samples (same genotype); **c.** glucose-treated mutant vs glucose-treated Col-0. miR828 did not yield a specific amplification.

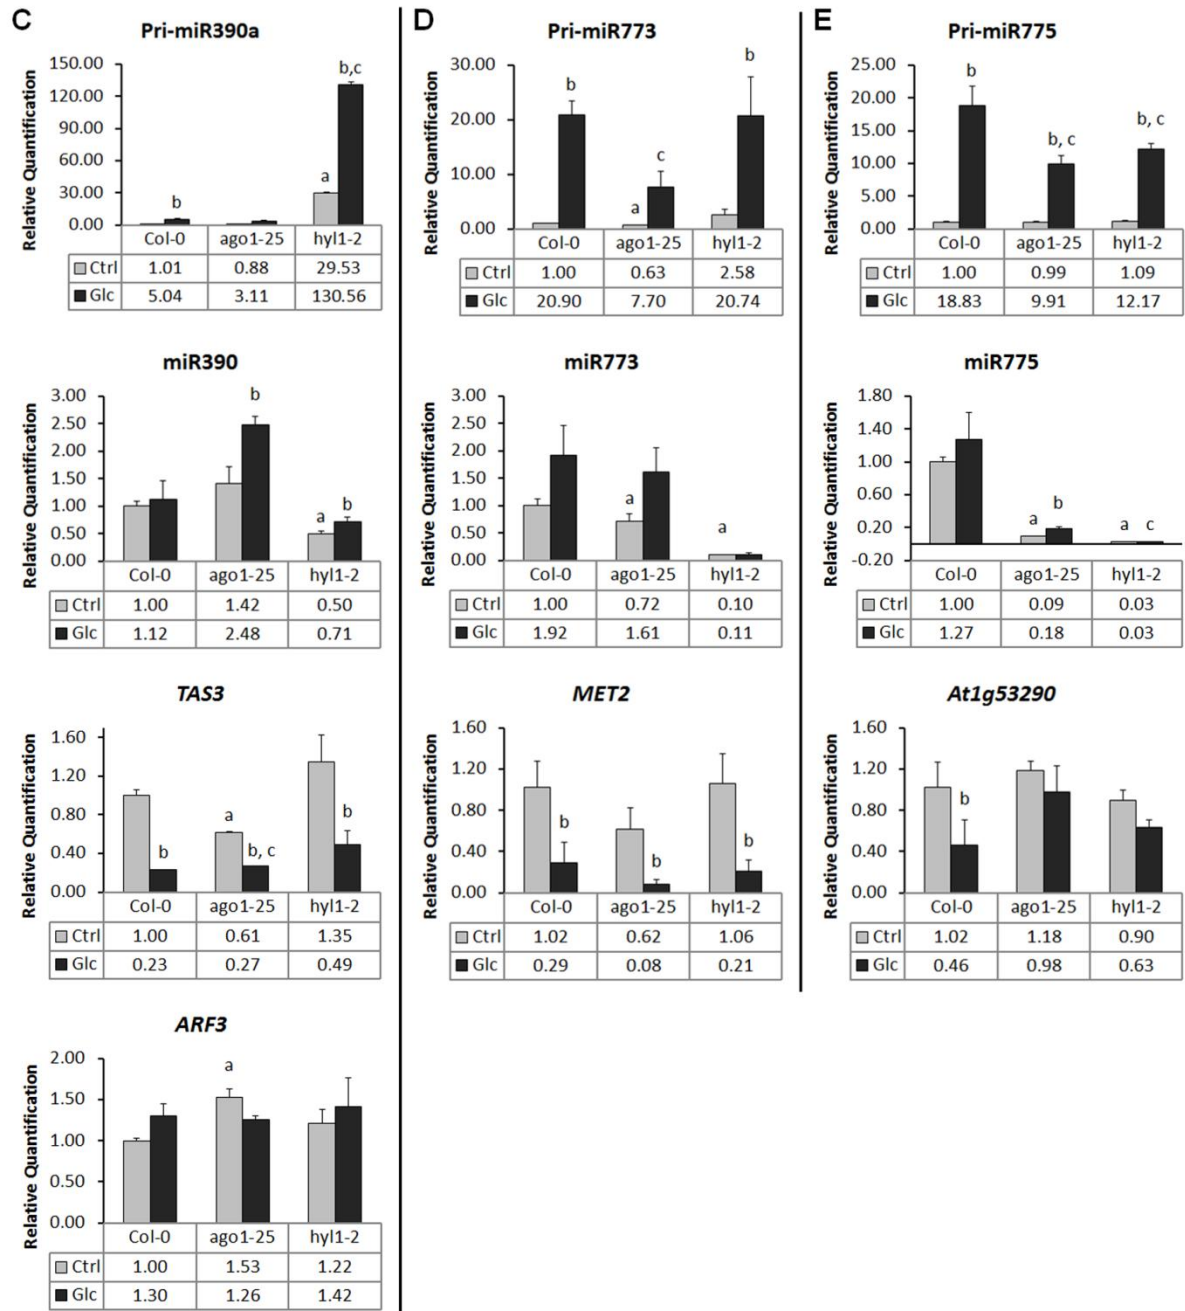

Supplementary Fig. S6. Continued.

**T**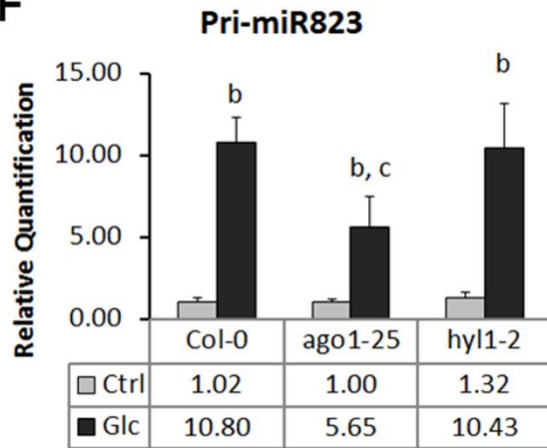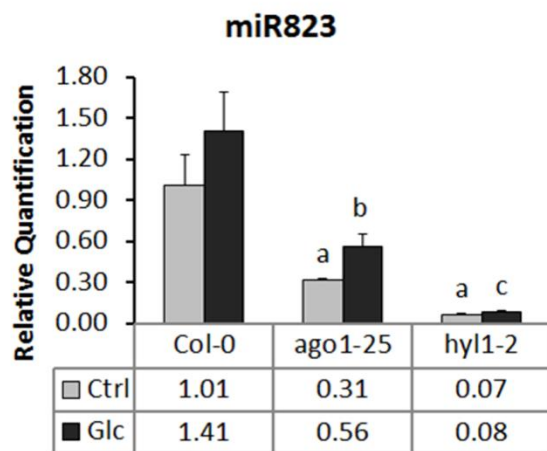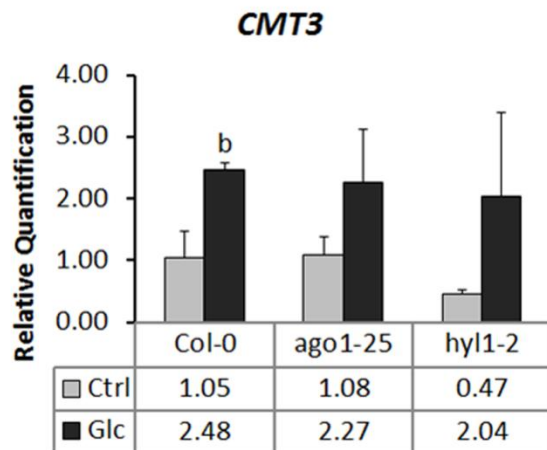**G**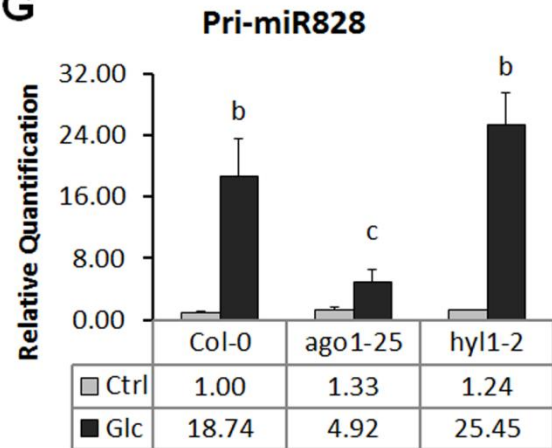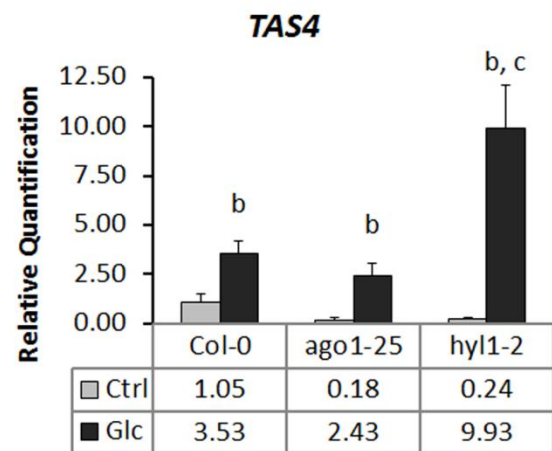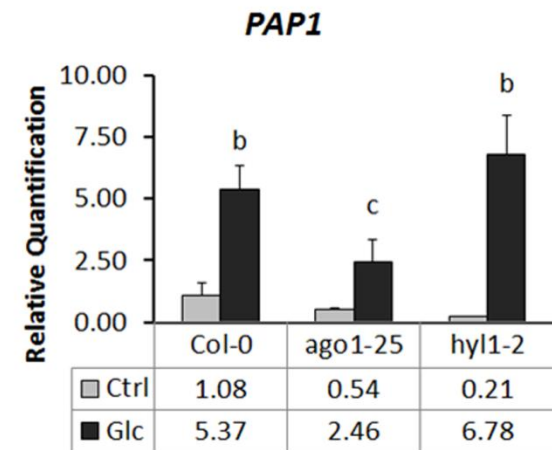

Supplementary Fig. S6. Continued.



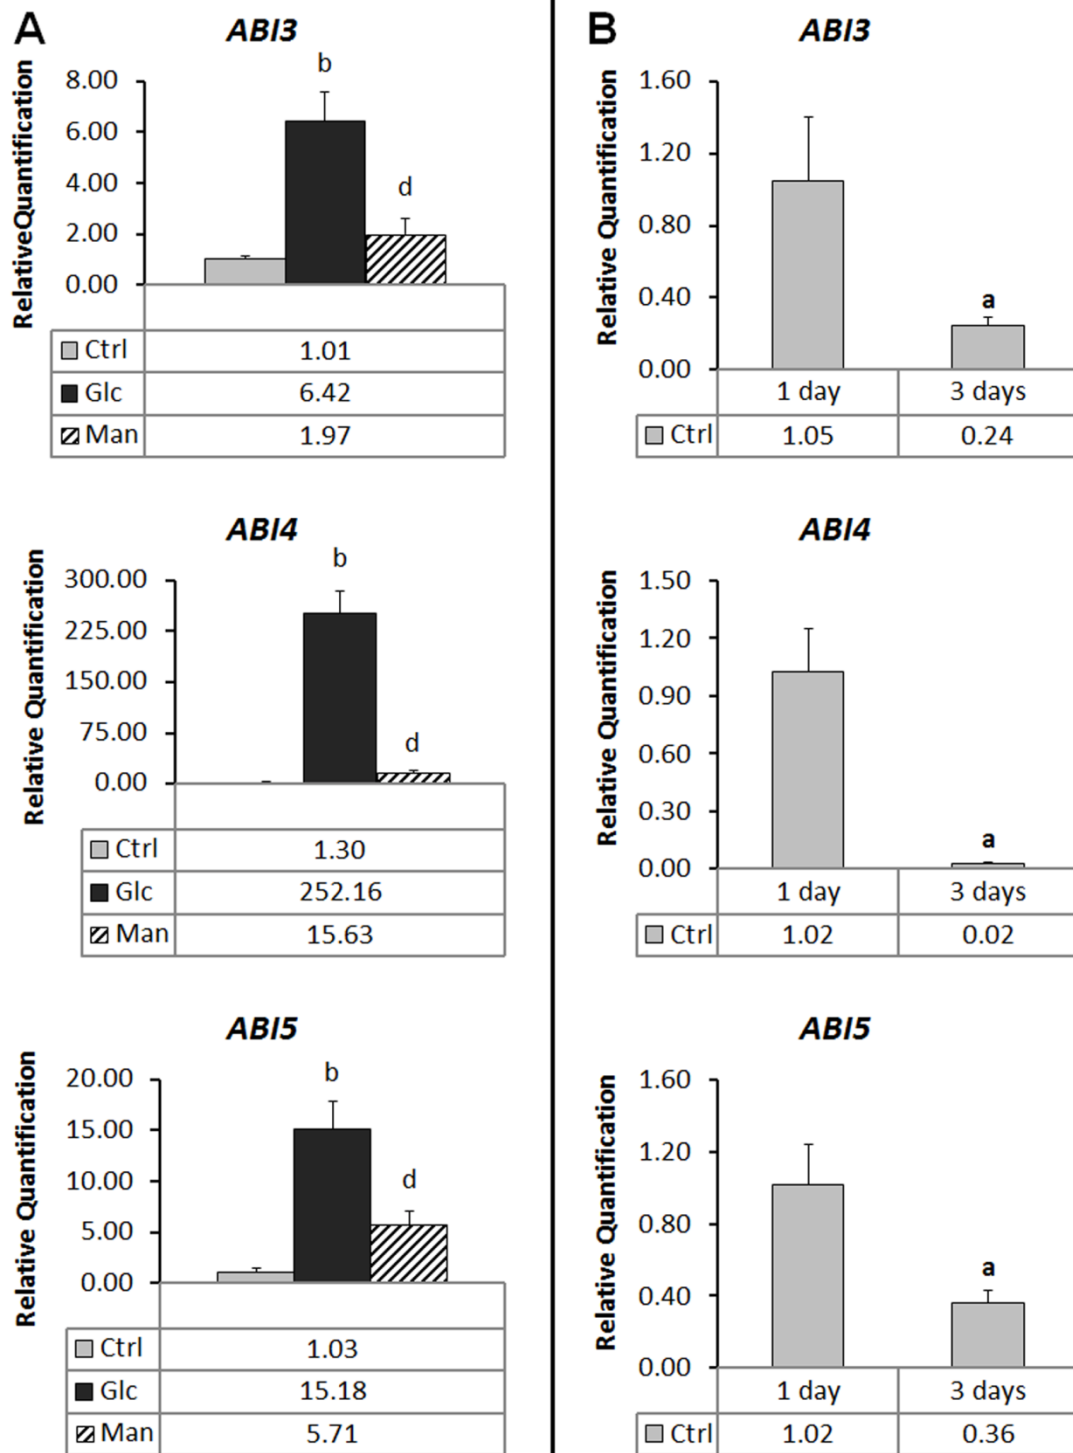

**Supplementary Fig. S7.** Validation of glucose-promoted changes on *ABI3*, *ABI4* and *ABI5* accumulation. **(A)** Relative expression of *ABI3*, *ABI4* and *ABI5* in Col-0 seedlings grown in 4% glucose or 4% mannitol in comparison to untreated samples three days after light exposure (ALE). **(B)** Relative expression of *ABI3*, *ABI4* and *ABI5* in untreated Col-0 seedlings with one day ALE in comparison to three days ALE samples. The values are means of three biological replicates  $\pm$  SD. Below each graph is given the relative transcript abundance. Changes in transcript accumulation were considered significant for differences with fold change  $\geq |1.5|$  and according to Student's *t* test ( $p < 0.05$ ) for the following comparisons: **a.** untreated one day ALE vs three days ALE samples; **b.** glucose vs untreated samples; **d.** mannitol- vs glucose-treated samples.
